# Supplementary material for: Sphingosine 1 Phosphate (S1P) Receptor 1 Is Decreased in Human Lung Microvascular Endothelial Cells of Smokers and Mediates S1P Effect on Autophagy
Source: Cells. 2021 May 14;10(5):1200. doi: 10.3390/cells10051200 (PMC8156252; doi:10.3390/cells10051200)

**Table S1.** Characteristics of Donors. Clinical information for the human lung tissue samples obtained through the National Jewish Health Human Lung Tissue Consortium are listed. Non-smokers were defined as individuals without any smoking history or a very remote and minimal smoking history. Smokers were defined as individuals with active smoking history until their death. Primary lung microvascular endothelial cells were isolated from certain individuals and used for cell culture experiments, whereas the immunofluorescence (IF) experiments were performed on paraffin-embedded lung tissue sections. \*Smoked 2-3 cigarettes/month for 3 years. \*\*Smoked 1 cigarette/day for 1 year. \*\*\*Smoked marijuana, cocaine >20 years ago. x: Information is not applicable to the sample.

| No.               | Clinical Information |           |                              | Corresponding Experiments |                          |                |
|-------------------|----------------------|-----------|------------------------------|---------------------------|--------------------------|----------------|
|                   |                      |           |                              | Cell Culture              |                          | Lung Tissue IF |
| No.               | Donor Age            | Donor Sex | Smoking History              | Passage No.               | Figure                   | Figure         |
| <b>Non-Smoker</b> |                      |           |                              |                           |                          |                |
| 1                 | 76                   | M         | Non-smoker                   | 2                         | 2a; S1a,b.               | x              |
| 2                 | 15                   | M         | Non-smoker                   | 4                         | 2a,b; 4a-g; S1a,b.       | x              |
| 3                 | 35                   | M         | Non-smoker                   | 3                         | 2a,b; 4a-g; S1a,b.       | x              |
| 4                 | 77                   | F         | Non-smoker                   | 5                         | 2a,b; 4a-g; S1a,b.       | x              |
| 5                 | 40                   | M         | Remote*                      | 4                         | 2a; 4a,c, d, g; S1a,b.   | x              |
| 6                 | 59                   | F         | Non-smoker                   | 2                         | 2a,b; 4a,b,d,e,f; S1a,b. | S2b            |
| 7                 | 31                   | M         | Remote**                     | x                         | x                        | S2b            |
| 8                 | 79                   | F         | Non-smoker                   | x                         | x                        | S2b            |
| 9                 | 62                   | F         | Non-smoker                   | x                         | x                        | S2b            |
| 10                | 61                   | F         | Non-smoker                   | x                         | x                        | S2b            |
| 11                | 66                   | F         | Non-smoker                   | x                         | x                        | S2b            |
| 12                | 56                   | M         | Non-smoker                   | x                         | x                        | S2b            |
| 13                | 39                   | M         | Non-smoker                   | x                         | x                        | S2b            |
| 14                | Unknown              | M         | Non-smoker                   | x                         | x                        | S2b            |
| 15                | 76                   | F         | Non-smoker                   | x                         | x                        | S2b            |
| 16                | 61                   | F         | Non-smoker                   | x                         | x                        | S2b            |
| <b>Smoker</b>     |                      |           |                              |                           |                          |                |
| 1                 | 55                   | M         | >40 pack-years               | 5                         | 2a,b; 4b,e,f; S1a,b.     | x              |
| 2                 | 55                   | F         | 30 pack-years                | 4                         | 2a,b; 4a-g; S1a,b.       | x              |
| 3                 | 62                   | F         | 40 pack-years                | 3                         | 2a,b; 4a-g; S1a,b.       | x              |
| 4                 | 52                   | M         | Not specified                | 4                         | 4a,c.                    | S2b            |
| 5                 | 52                   | M         | Smoked <1 ppd for decades*** | 3                         | 4a.                      | S2b            |
|                   |                      |           |                              | 5                         | 2a; S1a,b.               |                |
| 6                 | 59                   | F         | 1.5 pack-years               | 3                         | 2a,b; 4a,b,d,e,f; S1a,b. | S2b            |
| 7                 | 32                   | M         | 12.75 pack-years             | x                         | x                        | S2b            |
| 8                 | 61                   | F         | 0.5-1ppd for 30 years        | x                         | x                        | S2b            |
| 9                 | 55                   | F         | 30 pack-years                | x                         | x                        | S2b            |
| 10                | 36                   | F         | 1-2ppd for 5-10 years        | x                         | x                        | S2b            |
| 11                | 23                   | F         | 0.5ppd                       | x                         | x                        | S2b            |
| 12                | 43                   | F         | 20 pack-years                | x                         | x                        | S2b            |
| 13                | 50                   | M         | 52.5 pack-years              | x                         | x                        | S2b            |
| 14                | 57                   | M         | 15 pack-years                | x                         | x                        | S2b            |

**Figure S1.** *S1P2* and *ACTA-2* mRNA Expression in HLMVEC. **(a)** Relative *S1P2* mRNA expression HLMVEC isolated from non-smokers (n=6) and smokers (n=5), measured by RTqPCR, normalized to the housekeeping gene H18S using the  $2^{-\Delta\Delta CT}$  method and then expressed as a fold-change versus mean control (non-smoker) expression. p=0.72; 2-tailed unpaired Student t-test. **(b)** Relative *ACTA-2* mRNA expression in HLMVEC isolated from non-smoker (n=6) and smoker (n=5) donors, measured as in (a). p=0.12; 2-tailed unpaired Student t-test. Each data point represents an individual donor; horizontal lines are mean  $\pm$  SEM.

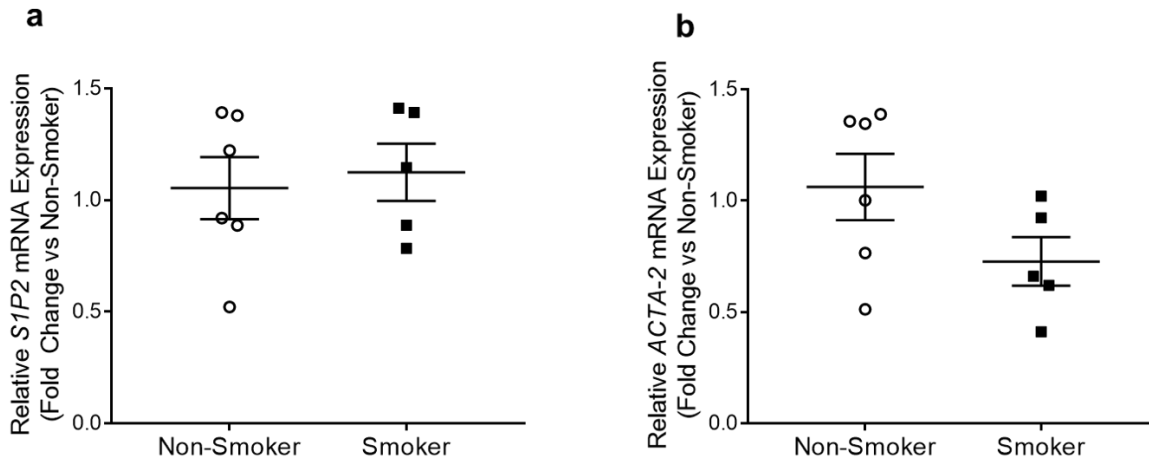

**Figure S2.** S1P1 in Human Lung Parenchyma. **(a)** Representative images focusing on alveolar areas using immunofluorescence performed on human non-smoker (NS) and smoker (Sm) fixed lungs, using antibodies against S1P1 (red), CD31 (green), and DAPI nuclear staining (blue). Inset (white box) shown at higher magnification for Sm lung. Images were captured at 200X; scale bar is 100  $\mu$ m; scale bar in the magnified inset-image is 50  $\mu$ m. White arrows are endothelial cells expressing S1P1, identified as positive for S1P1, CD31, and DAPI within a single cell. **(b)** S1P1 abundance in human alveolar tissue was quantified as the proportion (%) of CD31-positive cells positive for S1P1 in 11 non-smokers and smokers. 1 slide was prepared per individual and 5 alveolar areas were analyzed per slide. Each data point represents an individual donor.  $p=0.75$ ; 2-tailed unpaired Student t-test. Horizontal lines are mean  $\pm$  SEM.

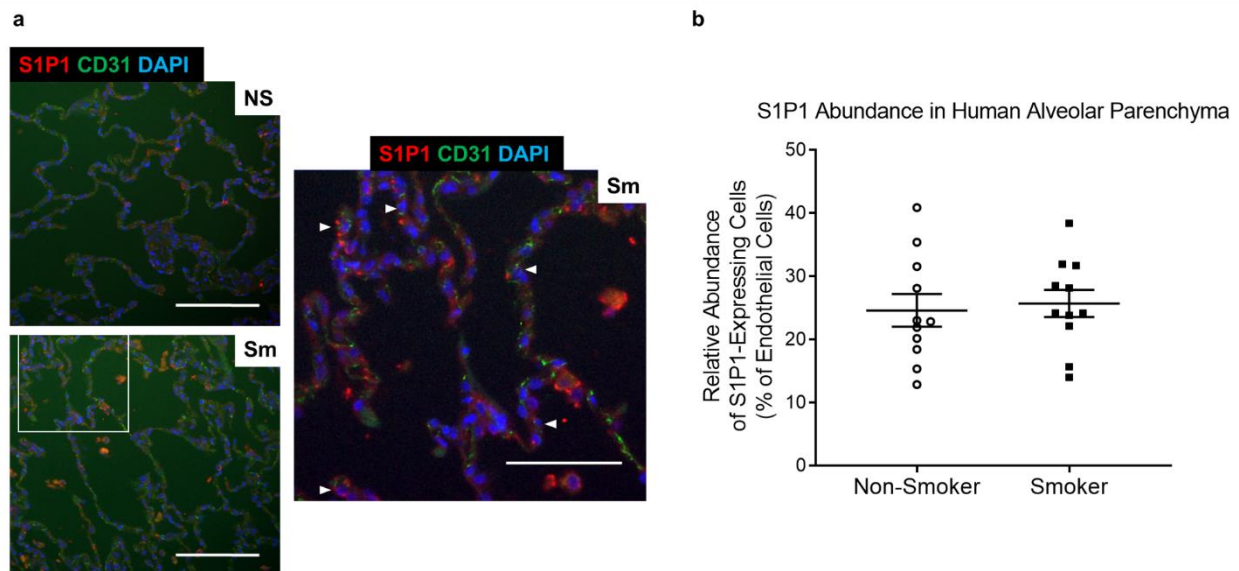

Supplement: Supplementary file 1 [file cells-10-01200-s001.zip › cells-1197867-SI.pdf]
